# Supplementary material
Source: PubMed Central journal article supplement (PMC9991069)
Supplement: NIHMS1844940-supplement-Supplemental_Content__tif__pdf__etc___PDF_Preferred__1.pdf [file NIHMS1844940-supplement-Supplemental_Content__tif__pdf__etc___PDF_Preferred__1.pdf]

## ASSISTS Group

- **Steering Committee:** Lauren S. Blieden, Nicholas P. Bell, Robert M. Feldman, David S. Greenfield, Ronald L. Gross, Jeffrey M. Liebmann, Steve L. Mansberger, Louis R. Pasquale, Robert N. Weinreb
- **Data Coordinating Center:** Lauren S. Blieden, Alice Z. Chuang
- **Data and Safety Monitoring Board:** Dale K. Heuer, Rebecca Lundstroth, Mark B. Sherwood, Martha M. Wright
- **Study Managers:** Laura A. Baker and Kimberly A. Mankiewicz
- **Editorial Assistance:** Kimberly A. Mankiewicz

## Sites

- **Bascom Palmer Eye Institute—Miami, Miami, FL:** Principal Investigator: Steven J. Gedde; Sub-Investigators: Ta Chen (Peter) Chang, Alana Grajewski, Richard Lee, Richard Parrish, Sarah Wellik, Luis Vazquez; Study Coordinator: Ruth Vandembroucke
- **Bascom Palmer Eye Institute—Palm Beach, Palm Beach Gardens, FL:** Principal Investigator: Krishna Kishor; Sub-Investigators: David S. Greenfield, Arindel S. Maharaj; Study Coordinator: Chantey Roberts
- **Devers Eye Institute/Legacy Health, Portland, OR:** Principal Investigator: Steven L. Mansberger; Sub-Investigators: Claude Burgonye, Emily Jones, Robert Kinast; Study Coordinator: Gordon Barker, Casie Goldman
- **Feinberg School of Medicine, Northwestern University, Chicago, IL:** Principal Investigator: Angelo P. Tanna; Sub-Investigator: Anupama Anchala; Study Coordinator: Crystal Santillanes, Nicole Seddon
- **Glaucoma Consultants of St. Louis, Chesterfield, MO:** Principal Investigator: Paul M. Tesser; Study Coordinators: Jeremy Beatty, Angela Walters
- **Glaucoma Institute of Northern NJ, Rochelle Park, NJ:** Principal Investigator: Paul Lama; Sub-Investigator: Linda Huang; Study Coordinator: Vanessa M. Mora
- **Massachusetts Eye and Ear Infirmary, Boston, MA:** Principal Investigator: Ambika Hoguet; Sub-Investigators: Louis Pasquale; Study Coordinator: Ai Ren
- **New York Eye and Ear Infirmary of Mount Sinai, New York, NY:** Principal Investigator: Joseph Panarelli; Sub-Investigators: Reena Garg, Paul Sidoti; Study Coordinators: Lorena Dominguez, Katy Tai, Meliza Unson
- **Robert Cizik Eye Clinic, Ruiz Department of Ophthalmology and Visual Science, McGovern Medical School at The University of Texas Health Science Center at Houston, Houston, TX:** Principal Investigator: Nicholas P. Bell; Sub-Investigators: Lauren S. Blieden, Robert M. Feldman, David A. Lee; Study Coordinators: Theodore Baker, Ephrem Melese
- **Stiles Eyecare Excellence and Glaucoma Institute, Overland Park, KS:** Principal Investigator: Michael Stiles; Sub-Investigators: Ann Stechschulte, Amanda Strom; Study Coordinator: Jessica Punjabi
- **University of North Carolina Kittner Eye Center, Chapel Hill, NC:** Principal Investigator: David Fleischman; Sub-Investigators: Donald L. Budenz, O'Rese Knight; Study Coordinators: Cassandra Barnhart, Elizabeth DuBose
- **Vanderbilt Eye Institute, Nashville, TN:** Principal Investigator: Rachel Kuchtey; Sub-Investigator: Eric Brown; Study Coordinator: Scott Ruark
- **West Virginia University Eye Institute, Morgantown, WV:** Principal Investigator: Ronald L. Gross; Sub-Investigator: Brian McMillan
- **Wills Eye Hospital, Philadelphia, PA:** Principal Investigator: Anand Mantravadi; Sub-Investigators: Scott Fudenberg, Daniel Lee, L. Jay Katz, Jonathan Myers; Study Coordinator: Jeanne Molineaux, Lillian Nguyen, Kamran Rahmatnejad
